# Supplementary material for: Preparation, Optimization, and In-Vitro Evaluation of Brusatol- and Docetaxel-Loaded Nanoparticles for the Treatment of Prostate Cancer
Source: MDPI journal article supplement (doi:10.3390/pharmaceutics16010114), 2024-01-16
Supplement: s1 [file s1]

## Supplementary Information

# Preparation, Optimization, and In-Vitro Evaluation of Brusatol- and Docetaxel-Loaded Nanoparticles for the Treatment of Prostate Cancer

Tayo Alex Adekiya <sup>1</sup>, Madison Moore <sup>2</sup>, Michael Thomas <sup>2</sup>, Gabriel Lake <sup>1</sup>, Tamaro Hudson <sup>3</sup> and Simeon K. Adesina <sup>1,\*</sup>

<sup>1</sup> Department of Pharmaceutical Sciences, College of Pharmacy, Howard University, Washington, DC 20059, USA

<sup>2</sup> Department of Biology, Howard University, Washington, DC 20059, USA

<sup>3</sup> Cancer Center, Howard University, Washington, DC 20059, USA

\* Correspondence: simeon.adesina@howard.edu; Tel.: +1-202-250-5304; Fax: +1-202-806-7805

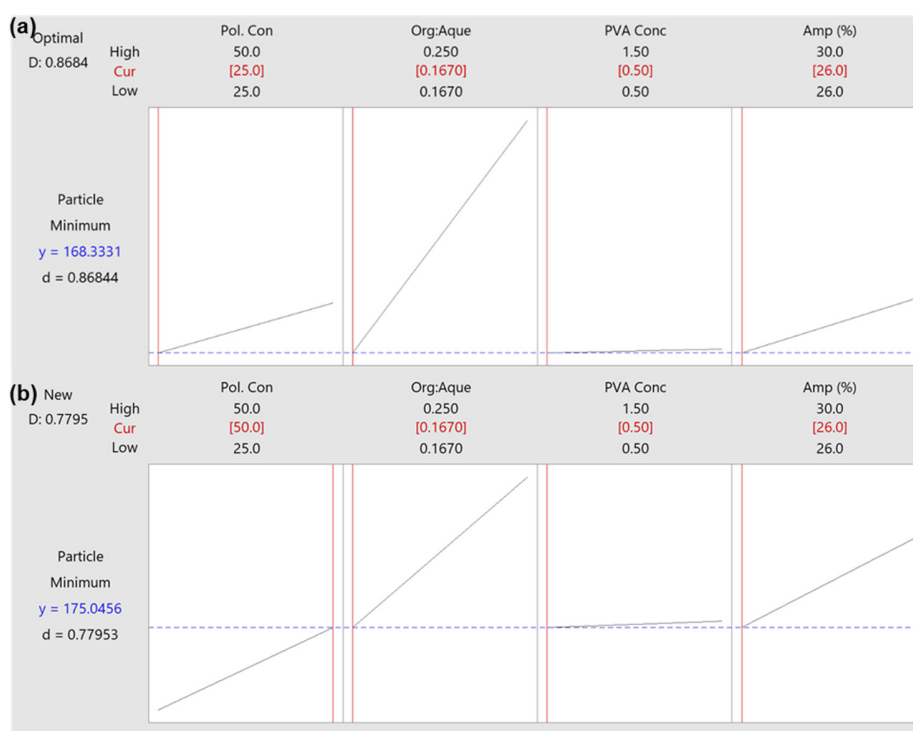

**Figure S1:** (a) Proposed values of each factor to achieve a particle size of 168.33 nm with composite desirability of 0.86844 (b) Proposed values of each factor to achieve a particle size of 175.05 nm with composite desirability of 0.77953.

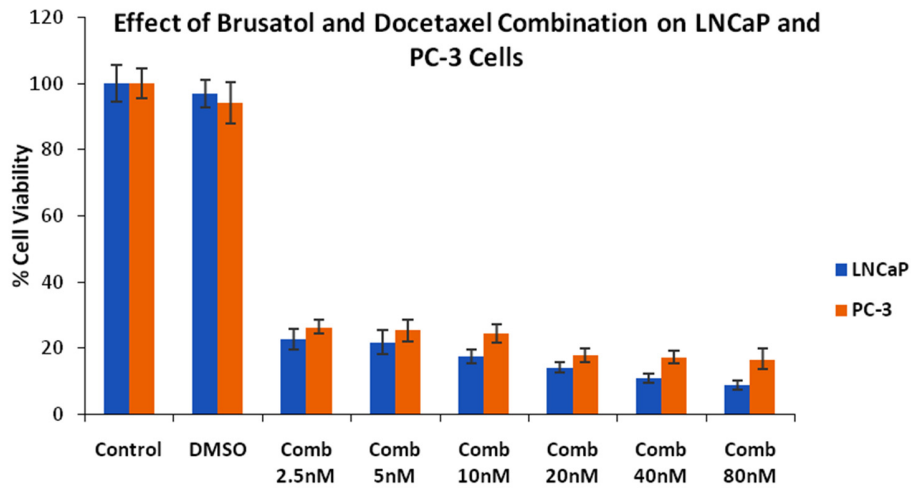

**Figure S2:** Percent cell viability of LNCaP and PC-3 cells treated with combination brusatol and docetaxel solution (50:50) *in vitro* at 72 hours (mean  $\pm$  SD, n = 4). e.g. Comb 2.5nM represents 2.5 nM of brusatol + 2.5 nM of docetaxel. Control represents media only and DMSO represents 0.01% DMSO in media.

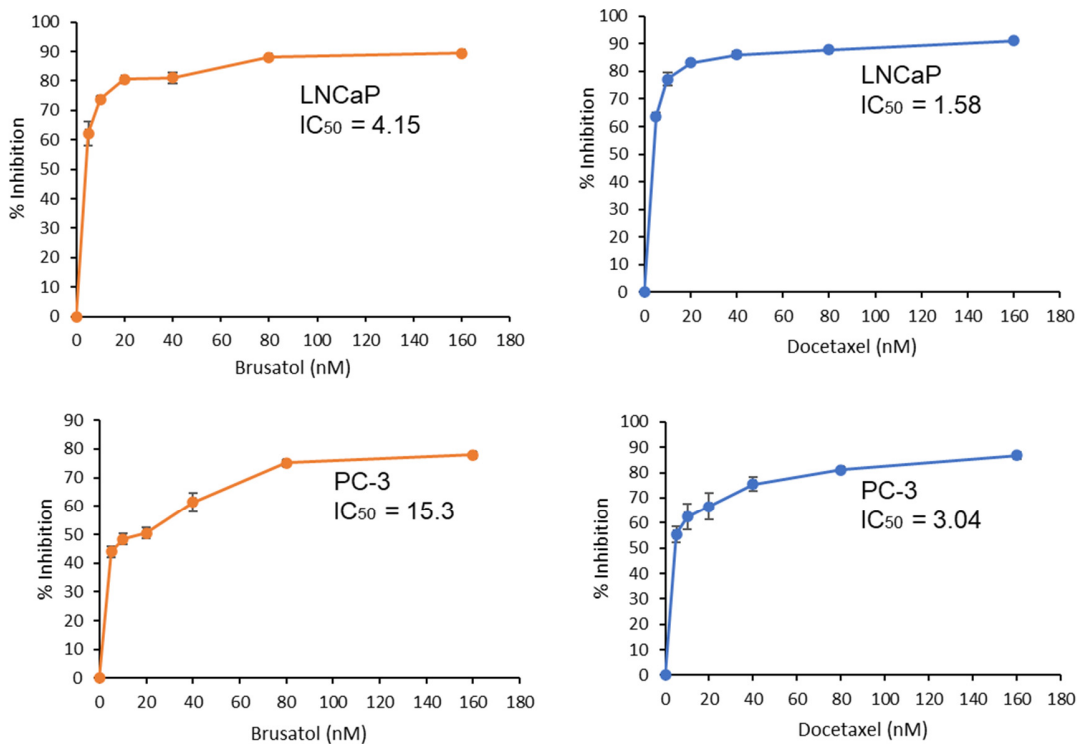

**Figure S3:** Effect of brusatol and docetaxel on the growth of prostate cancer cells, namely LNCaP and PC-3 cell lines. IC<sub>50</sub>, half-maximal inhibitory concentration: orange color represents brusatol and blue color represent docetaxel at 72 hours.

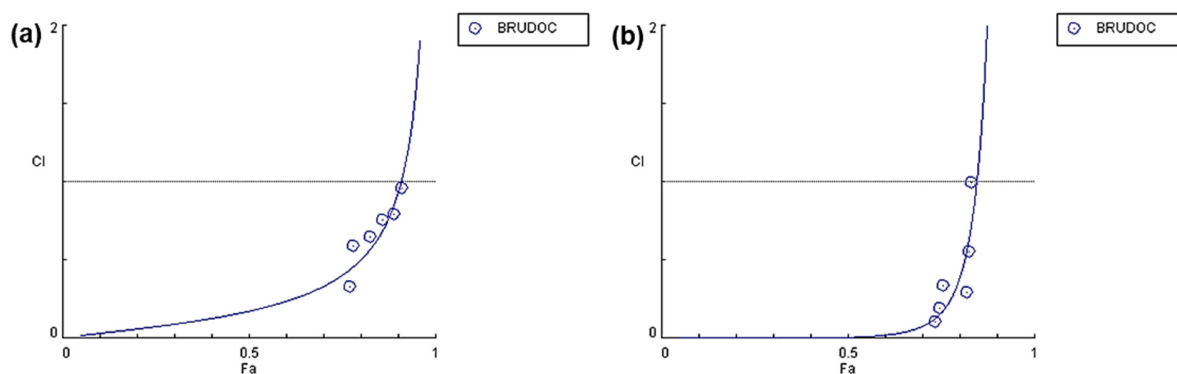

**Figure S4:** Combination index (CI) plot of combination brusatol and docetaxel solution at fixed ratio (50:50) of each drug for 72 hours on (a) LNCaP cells, (b) PC-3 cells. The CI was calculated by using the Chou and Talalay equation. CI values of  $CI < 1$ ,  $CI > 1$ , and  $CI = 1$  denote synergism, antagonism, and additivity, respectively.

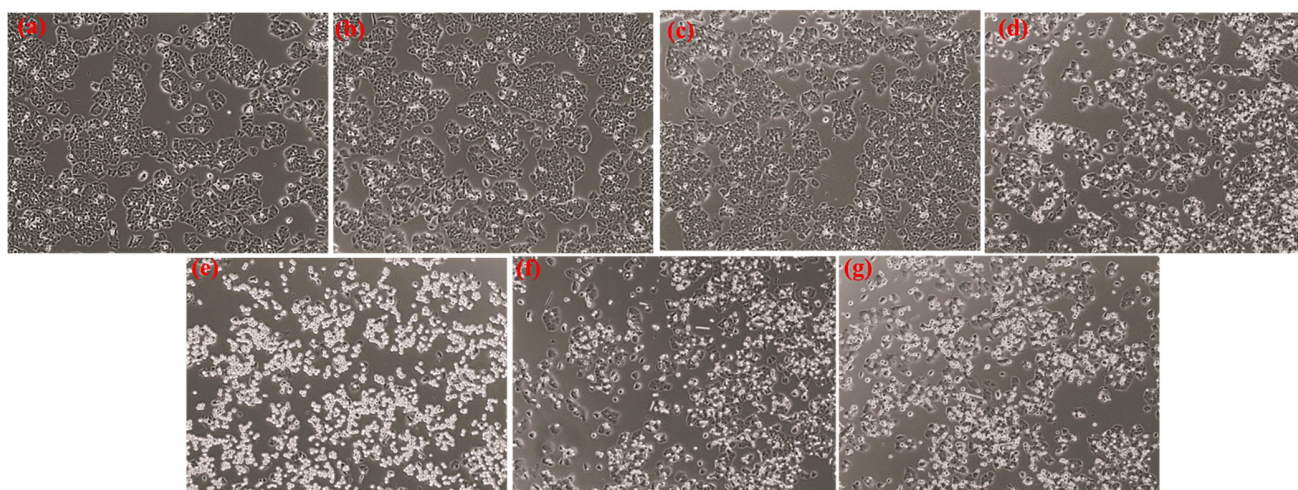

**Figure S5:** Phase contrast images visualized by EVOS inverted microscope ( $\times 40$  magnification). showing LNCaP cells treated with (a) media only (b) DMSO solution, (c) blank-NPs-60nM, (d) brusatol-40nM, (e) docetaxel-60nM, (f) docetaxel-60nM + brusatol-40nM solution, (g) docetaxel-60nM + brusatol-40nM nanoparticles at 24h post-treatment.

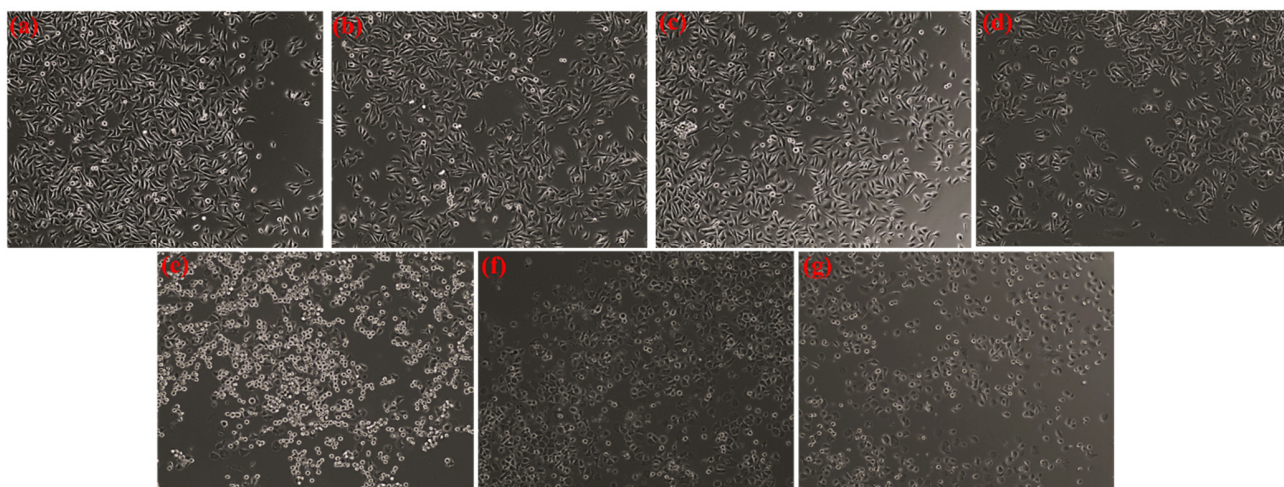

**Figure S6:** Phase contrast images visualized by EVOS inverted microscope ( $\times 40$  magnification), showing PC-3 cells treated with (a) media only, (b) DMSO solution, (c) blank-NPs-60nM, (d) brusatol-40nM, (e) docetaxel-60nM, (f) docetaxel-60nM + brusatol-40nM solution, (g) docetaxel-60nM + brusatol-40nM nanoparticles at 24h post-treatment.

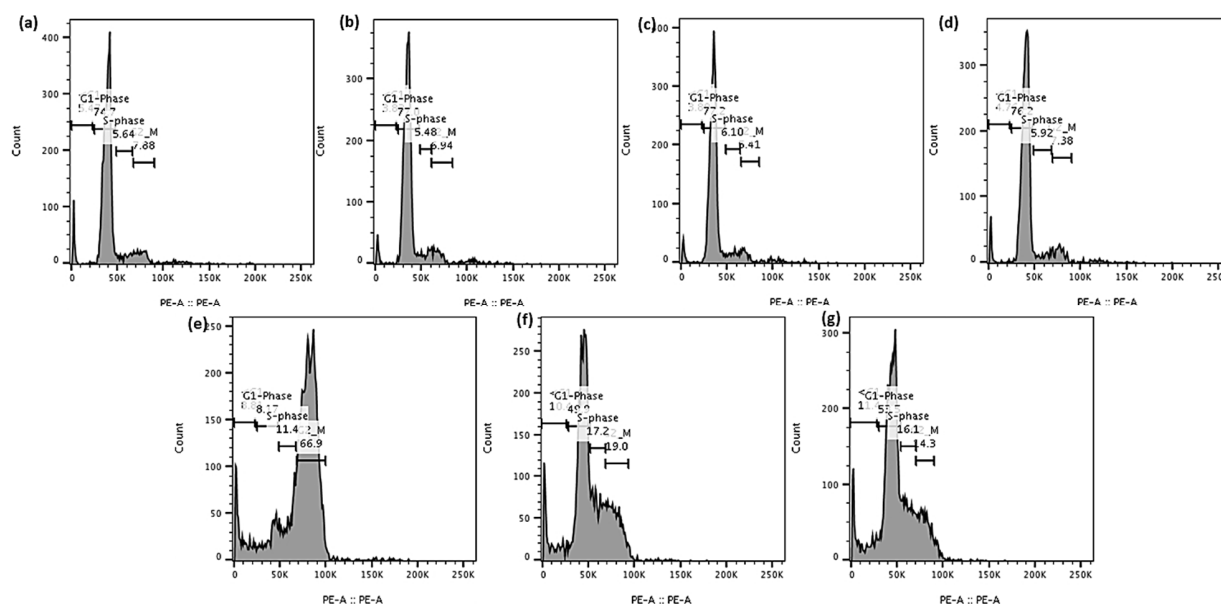

**Figure S7:** Representative flow cytometry histograms of cell cycle analysis of LNCaP cells treated with (a) control (b) DMSO solution, (c) blank-NPs-60nM, (d) brusatol-40nM, (e) docetaxel-60nM, (f) docetaxel-60nM + brusatol-40nM solution, (g) docetaxel-60nM + brusatol-40nM nanoparticles and incubated for 72h.

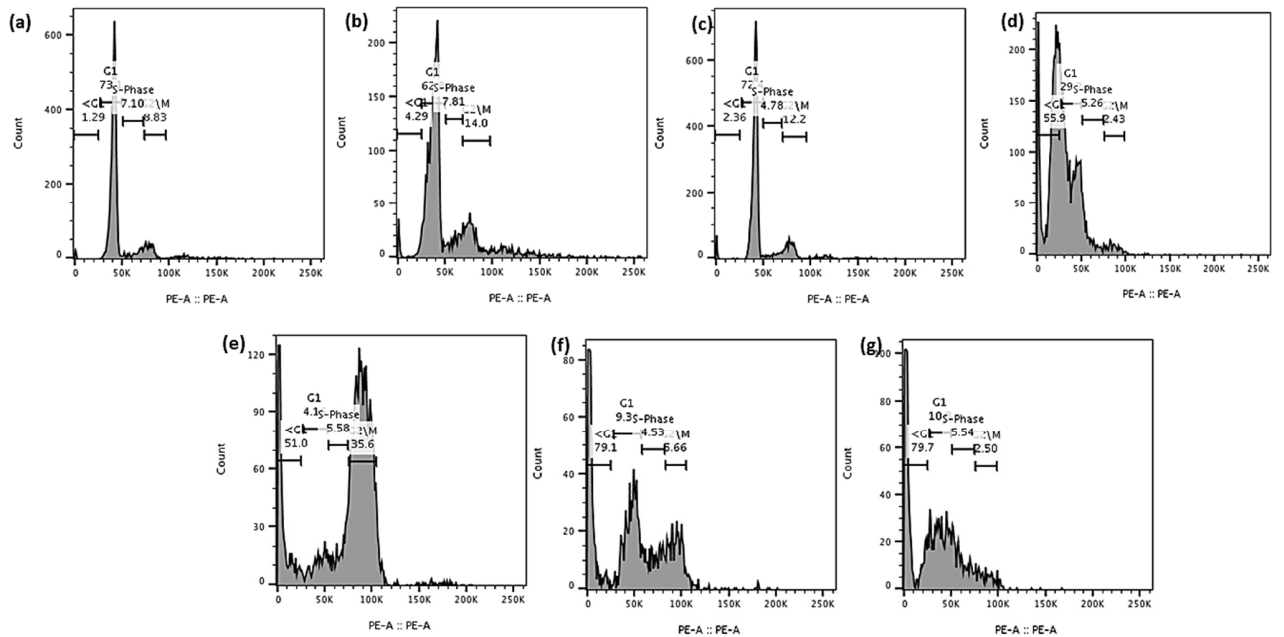

**Figure S8:** Representative flow cytometry histograms of cell cycle analysis of LNCaP cells treated with (a) control (b) DMSO solution, (c) blank-NPs-60nM, (d) brusatol-40nM, (e) docetaxel-60nM, (f) docetaxel-60nM + brusatol-40nM solution, (g) docetaxel-60nM + brusatol-40nM nanoparticles and incubated for 120h.

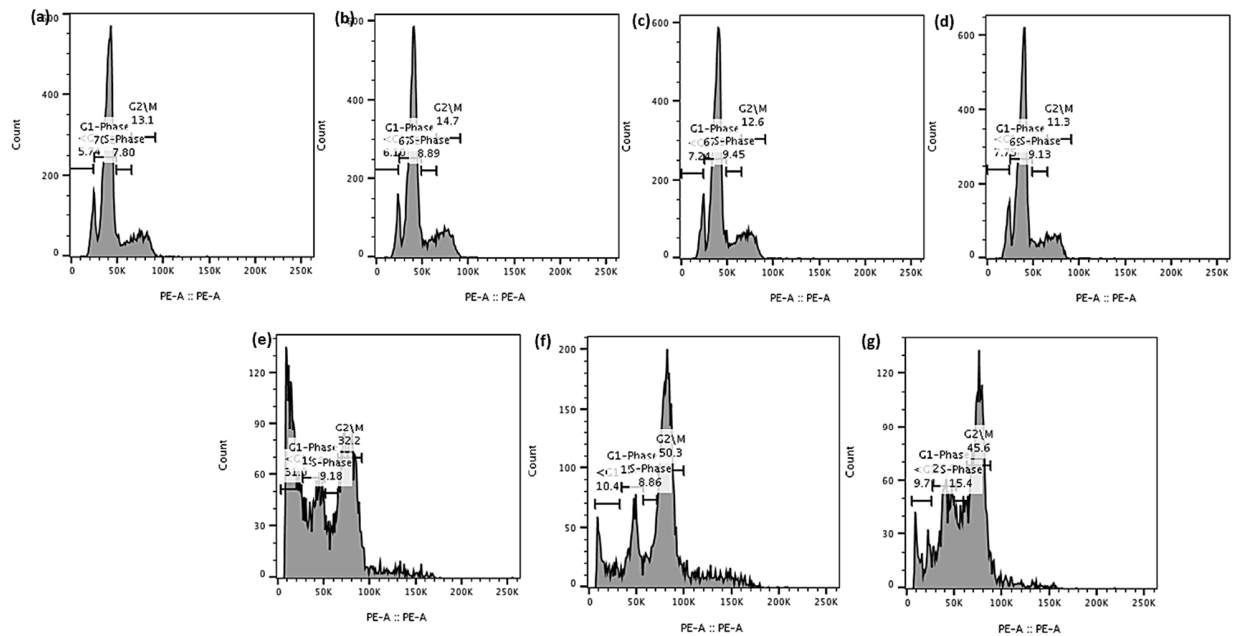

**Figure S9:** Representative flow cytometry histograms of cell cycle analysis of PC-3 cells treated with (a) control (b) DMSO solution, (c) blank-NPs-60nM, (d) brusatol-40nM, (e) docetaxel-60nM, (f) docetaxel-60nM + brusatol-40nM solution, (g) docetaxel-60nM + brusatol-40nM nanoparticles and incubated for 72h.

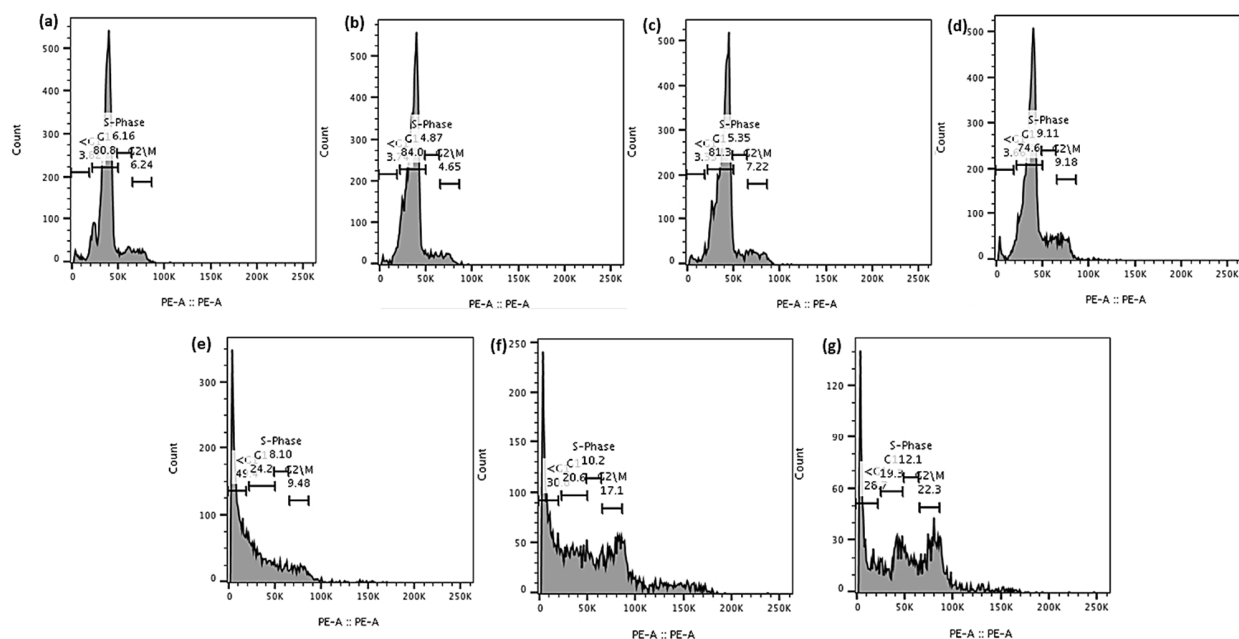

**Figure S10:** Representative flow cytometry histograms of cell cycle analysis of PC-3 cells treated with (a) control (b) DMSO solution, (c) blank-NPs-60nM, (d) brusatol-40nM, (e) docetaxel-60nM, (f) docetaxel-60nM + brusatol-40nM solution, (g) docetaxel-60nM + brusatol-40nM nanoparticles and incubated for 120h.

**Table S1:** Cell cycle analysis data for both LNCaP and PC-3 cells following flow cytometry evaluation ( $n = 3$ ).

| Treatment                               | LNCaP (%) |      |       | PC-3 (%) |      |       |
|-----------------------------------------|-----------|------|-------|----------|------|-------|
|                                         | G1        | G2/M | subG1 | G1       | G2/M | subG1 |
| Brusatol 40nM                           |           |      |       |          |      |       |
| 24 hour                                 | 66.6      | 16.6 | 1.02  | 66.1     | 14.6 | 7.94  |
| 72 hour                                 | 60.7      | 10.8 | 11.2  | 57       | 19.6 | 4.58  |
| 120 hour                                | 27.6      | 6.04 | 54.2  | 52       | 18.5 | 11.7  |
| Docetaxel 60nM                          |           |      |       |          |      |       |
| 24 hour                                 | 6.68      | 52.3 | 1.6   | 16.9     | 70.6 | 4.25  |
| 72 hour                                 | 8.17      | 66.9 | 8.81  | 19.8     | 32.2 | 31    |
| 120 hour                                | 4.16      | 35.6 | 51    | 15.8     | 13.2 | 66.3  |
| Brusatol 40nM + Docetaxel 60nM Solution |           |      |       |          |      |       |
| 24 hour                                 | 54.8      | 20.2 | 1.27  | 50.5     | 29.4 | 6.74  |
| 72 hour                                 | 54.1      | 14.2 | 11.7  | 17.8     | 55.6 | 4.84  |
| 120 hour                                | 9.21      | 7.33 | 78.6  | 17.3     | 17.2 | 58.1  |
| Brusatol 40nM+Docetaxel 60nM NP         |           |      |       |          |      |       |
| 24 hour                                 | 56.3      | 18   | 1.75  | 48.3     | 23.7 | 13.5  |
| 72 hour                                 | 53.5      | 14.3 | 11.4  | 25.8     | 45.6 | 9.71  |
| 120 hour                                | 10.3      | 2.5  | 79.7  | 10.4     | 23.6 | 56.4  |
